# Supplementary material for: Neuroprotection Mediated by Human Blood Plasma in Mouse Hippocampal Slice Cultures and in Oxidatively Stressed Human Neurons
Source: MDPI journal article supplement (doi:10.3390/ijms22179567), 2021-09-03
Supplement: s1 [file s1]

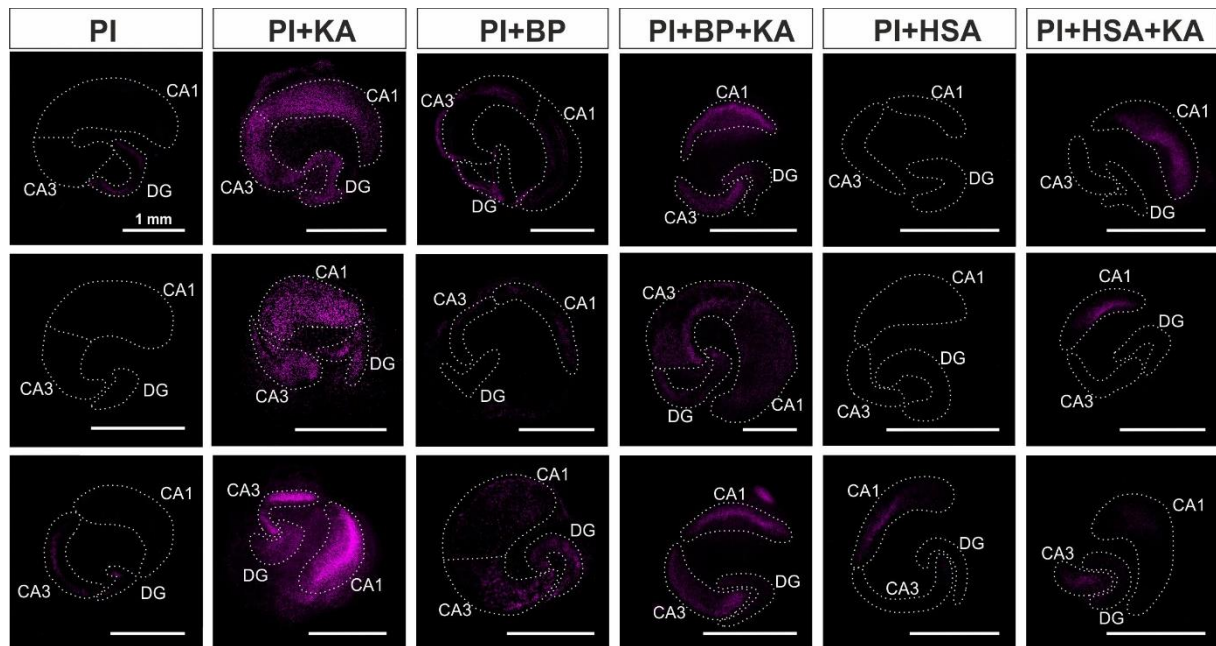

**Supplemental Figure S1: Exemplary pictures of PI-stained mouse hippocampal slice cultures.** Treatment of hippocampal slice cultures with kainic acid (KA) results in cell death which can be measured by staining with propidium iodide (PI). PI: propidium iodide, KA: kainic acid, BP: blood plasma, HSA: human serum albumin, CA1: cornu ammonis region 1, CA3: cornu ammonis region 3, DG: dentate gyrus.
